# Supplementary material for: Probing the supramolecular featuresviaπ–π interaction of a di-iminopyrene-di-benzo-18-crown-6-ether compound: experimental and theoretical study
Source: Royal Society of Chemistry journal article supplement (doi:10.1039/d0ra06929a), 2020-01-01
Supplement: d0ra06929a1.pdf [file d0ra06929a1.pdf]

## Probing the supramolecular features via $\pi$ - $\pi$ interaction of di-iminopyrene-di-benzo-18-crown-6-ether compound: experimental and theoretical study

Adina Coroaba<sup>a</sup>, Dragos-Lucian Isac<sup>\*a</sup>, Cristina Al-Matarneh<sup>a</sup>, Tudor Vasiliu<sup>a</sup>, Sorin-Alexandru Ibanescu<sup>a</sup>, Radu Zonda<sup>a</sup>, Rodinel Ardeleanu<sup>a</sup>, Andrei Neamtu<sup>a,b</sup>, Daniel Timpu<sup>c</sup>, Alina Nicolescu<sup>c</sup>, Francesca Mocchi<sup>a,d</sup>, Stelian S. Maier<sup>a,e</sup>, Aatto Laaksonen<sup>a,f</sup>, Marc Jean Médard Abadie<sup>a,g</sup>, Mariana Pinteala<sup>\*a</sup>

<sup>a</sup>Centre of Advanced Research in Bionanoconjugates and Biopolymers, "Petru Poni" Institute of Macromolecular Chemistry, 41A Grigore Ghica Voda Alley, 700487 Iasi, Romania.

<sup>b</sup>Center of Fundamental Research and Experimental Development in Translational Medicine, Regional Institute of Oncology, General Henri Mathias Berthelot St, 700483 Iasi, Romania.

<sup>c</sup>Physics of Polymers and Polymeric Materials, "Petru Poni" Institute of Macromolecular Chemistry, 41A Grigore Ghica Voda Alley, 700487 Iasi, Romania

<sup>d</sup>Department of Chemical and Geological Sciences, University of Cagliari, I-09042 Monserrato, Italy

<sup>e</sup>Polymers Research Center, "Gheorghe Asachi" Technical University of Iasi, 73 Mangeron Blvd., 700050 Iasi, Romania

<sup>f</sup>Department of Materials and Environmental Chemistry, Division of Physical Chemistry, Arrhenius Laboratory, Stockholm University, SE-106 91 Stockholm, Sweden

<sup>g</sup>Faculty of Science, University of Montpellier, Place E. Bataillon, 34095 Montpellier, France.

\* **Corresponding authors:** Mariana Pinteala, "Petru Poni" Institute of Macromolecular Chemistry, 41A Grigore Ghica Voda Alley, 700487 Iasi, Romania, e-mail: [pinteala@icmpp.ro](mailto:pinteala@icmpp.ro). Dragos-Lucian Isac, "Petru Poni" Institute of Macromolecular Chemistry, 41A Grigore Ghica Voda Alley, 700487 Iasi, Romania, e-mail: [isac.dragos@icmpp.ro](mailto:isac.dragos@icmpp.ro).

| Table of Contents                                                                                                                                                                                                                                                                                                                                                                                                                       | Page |
|-----------------------------------------------------------------------------------------------------------------------------------------------------------------------------------------------------------------------------------------------------------------------------------------------------------------------------------------------------------------------------------------------------------------------------------------|------|
| <b>Fig. S1</b> FTIR spectra of the di-iminopyrene-di-benzo-18-crown-6-ether compound .....                                                                                                                                                                                                                                                                                                                                              | S2   |
| <b>Fig. S2</b> <sup>1</sup> H-NMR spectra of the di-iminopyrene-di-benzo-18-crown-6-ether compound .....                                                                                                                                                                                                                                                                                                                                | S2   |
| <b>Fig. S3</b> <sup>13</sup> C-NMR spectra of the di-iminopyrene-di-benzo-18-crown-6-ether compound .....                                                                                                                                                                                                                                                                                                                               | S3   |
| <b>Fig. S4</b> Quantitative <sup>13</sup> C-NMR spectra of the diaminodibenzo-18-crown-6-ether compound .....                                                                                                                                                                                                                                                                                                                           | S3   |
| <b>Fig. S5</b> TGA and DTG curves of the di-iminopyrene-di-benzo-18-crown-6-ether .....                                                                                                                                                                                                                                                                                                                                                 | S4   |
| <b>Fig. S6</b> DSC curves of the di-iminopyrene-di-benzo-18-crown-6-ether .....                                                                                                                                                                                                                                                                                                                                                         | S4   |
| <b>Table S1.</b> Concentrations for the DPyDB-C=N-18C6 compound in different solvents as measured by QCM-D .....                                                                                                                                                                                                                                                                                                                        | S4   |
| <b>Table S2.</b> Theoretical values of the the oscillator strength values ( <i>f</i> ), calculated at the TD-DFT/6-311++G(d,p) level of theory and experimental of absorption wavelengths ( $\lambda_{\text{abs}}$ , nm) for the target compounds .....                                                                                                                                                                                 | S5   |
| <b>Fig. S7</b> The molecular system optimized with PBE0/6-311+G(d,p) .....                                                                                                                                                                                                                                                                                                                                                              | S6   |
| <b>Fig. S8</b> Potential energy surface scan for the dihedral angles C13–C14–C17=N18 and C17=N18–C19–C20 (labels in agreement with Figure S7) in proposed structure with PBE0/6-311+G(d,p) .....                                                                                                                                                                                                                                        | S6   |
| <b>Table S3.</b> The energy differences (Hartree) between the <b>i1</b> and <b>i2</b> position isomers, as well as the dipole moments .....                                                                                                                                                                                                                                                                                             | S6   |
| <b>Table S4.</b> Dihedral angle values [°] of <b>i1</b> and <b>i2</b> isomers computed with PBE0/6-311+G(d,p) method .....                                                                                                                                                                                                                                                                                                              | S7   |
| <b>Table S5.</b> Bond length values [Å] of <b>i1</b> and <b>i2</b> isomers computed with PBE0/6-311+G(d,p) method .....                                                                                                                                                                                                                                                                                                                 | S7   |
| <b>Table S6.</b> Valence angles values [°] of <b>i1</b> and <b>i2</b> isomers computed with PBE0/6-311+G(d,p) method .....                                                                                                                                                                                                                                                                                                              | S7   |
| <b>Fig. S9</b> Final structures obtained after the A) first simulation and B) second simulation of the DPyDB-C=N-18C6 molecules in the ion mixture. Each atom is colored as follows: C atoms are teal, O atoms are red, N atoms are blue, H atoms are white, K <sup>+</sup> atoms are orange spheres, Na <sup>+</sup> atoms are red spheres, Ca <sup>2+</sup> atoms are blue spheres and Cl <sup>-</sup> atoms are purple spheres ..... | S8   |

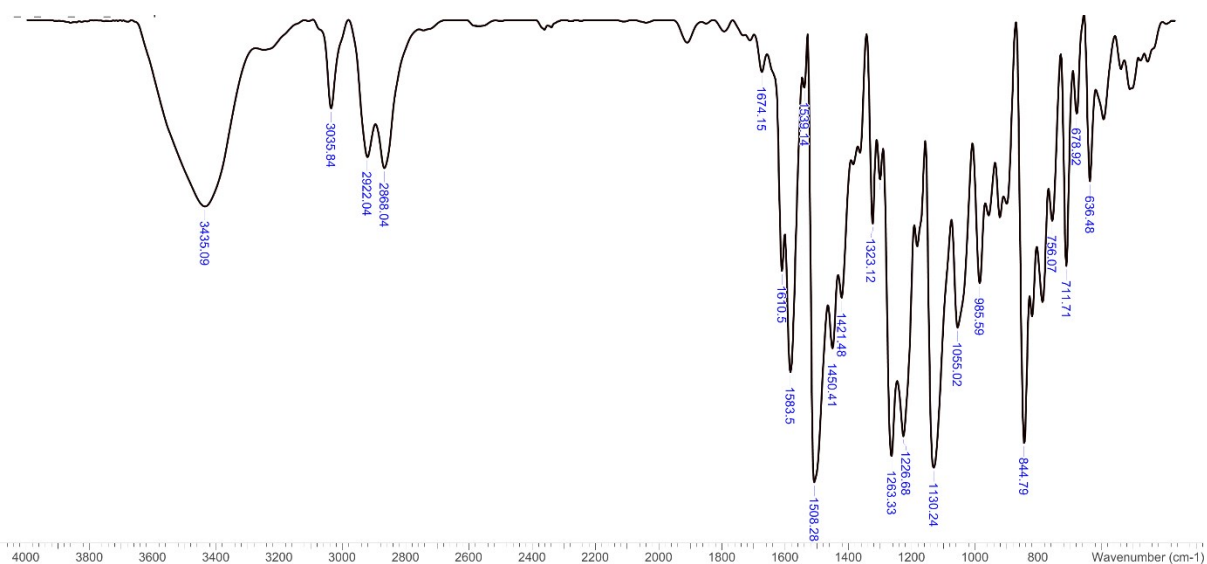

**Fig. S1** FTIR spectra of the di-iminopyrene-di-benzo-18-crown-6-ether compound

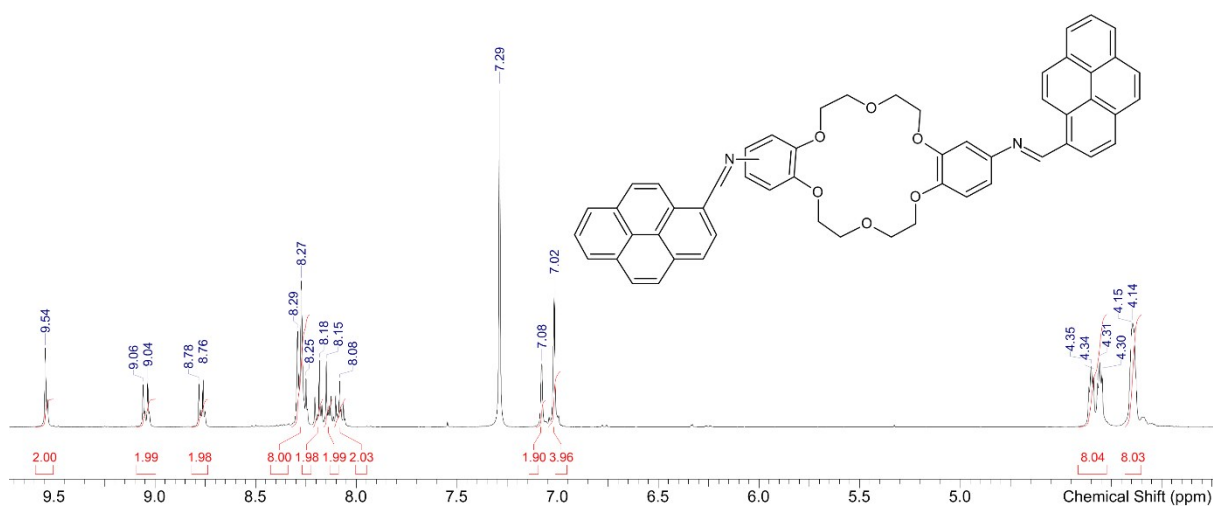

**Fig. S2**  $^1\text{H-NMR}$  spectra of the di-iminopyrene-di-benzo-18-crown-6-ether compound

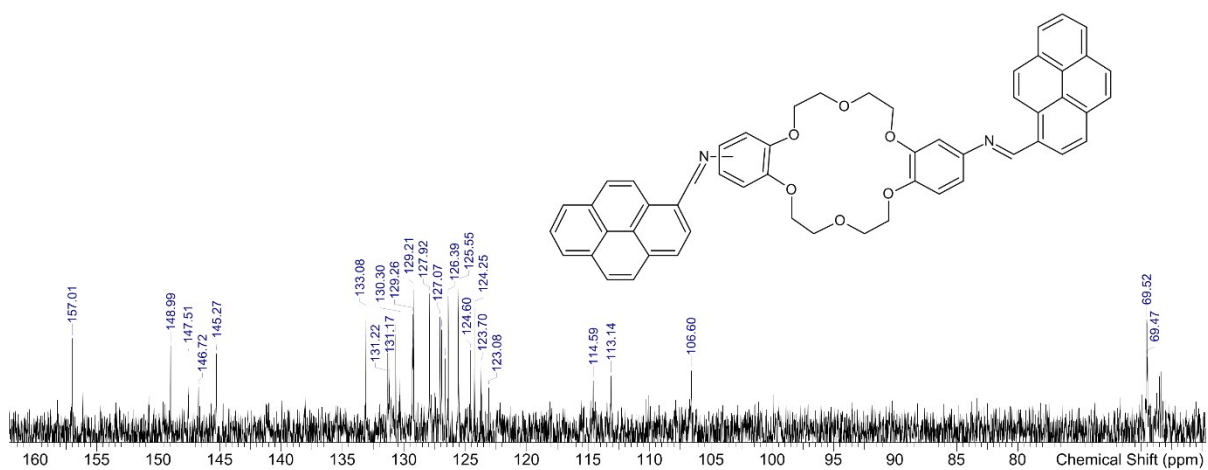

**Fig. S3**  $^{13}\text{C}$ -NMR spectra of the di-iminopyrene-di-benzo-18-crown-6-ether compound

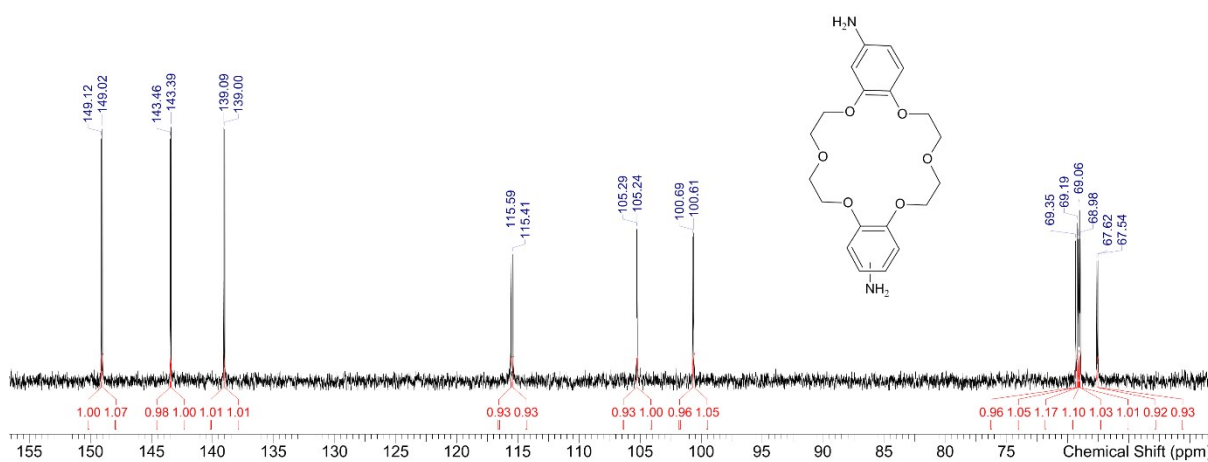

**Fig. S4** Quantitative  $^{13}\text{C}$ -NMR spectra of the diaminodibenzo-18-crown-6-ether compound

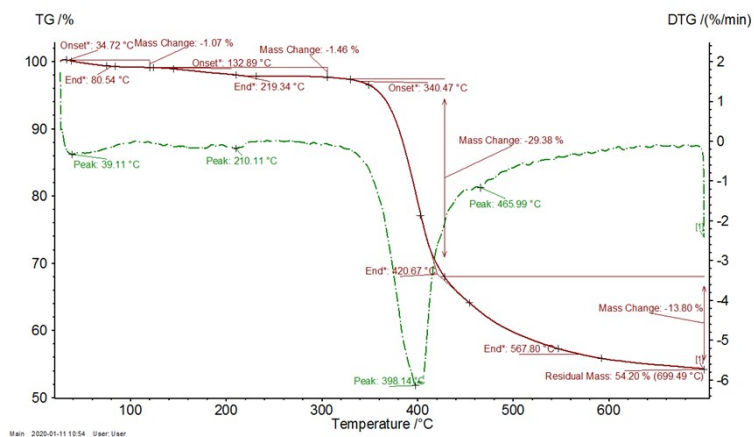

**Fig. S5** TGA and DTG curves of the di-iminopyrene-di-benzo-18-crown-6-ether

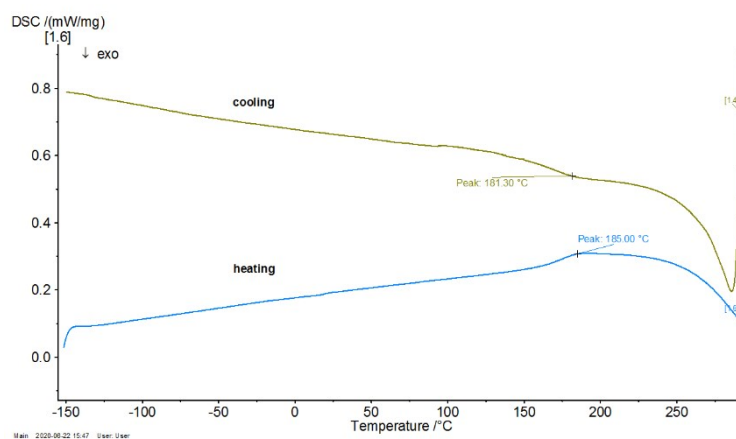

**Fig. S6** DSC curves of the di-iminopyrene-di-benzo-18-crown-6-ether

**Table S1.** Concentrations for the DPyDB-C=N-18C6 compound in different solvents as measured by QCM-D.

|                                      | $\Delta f$ (Hz) | C (mol/L)             |
|--------------------------------------|-----------------|-----------------------|
| DPyDB-C=N-18C6 in n-Hexane           | -28             | $5.82 \times 10^{-7}$ |
| DPyDB-C=N-18C6 in Toluene            | -105            | $3.25 \times 10^{-6}$ |
| DPyDB-C=N-18C6 in 1,2-Dichloroethane | -187            | $3.86 \times 10^{-6}$ |
| DPyDB-C=N-18C6 in Ethanol            | -81             | $2.51 \times 10^{-6}$ |

**Table S2.** Theoretical values of the oscillator strength values ( $f$ ), calculated at the TD-DFT/6-311++G(d,p) level of theory and experimental of absorption wavelengths ( $\lambda_{\text{abs}}$ , nm) for the target compounds.

| solvent            | TD-CAMB3LYP            |        |                        |        | TD-PBE0                |        |                        |        | TD-B3LYP               |        |                        |        | Exp.                   |        |
|--------------------|------------------------|--------|------------------------|--------|------------------------|--------|------------------------|--------|------------------------|--------|------------------------|--------|------------------------|--------|
|                    | i1                     |        | i2                     |        | i1                     |        | i2                     |        | i1                     |        | i2t                    |        |                        |        |
|                    | $\lambda_{\text{abs}}$ | $f$    | $\lambda_{\text{abs}}$ | A rel. |
| gas phase          | 377.66                 | 1.6309 | 374.90                 | 1.7835 | 427.68                 | 1.4170 | 426.74                 | 1.3719 | 444.84                 | 1.2768 | 444.59                 | 1.2210 | NA                     | NA     |
|                    | 370.61                 | 0.4828 | 370.19                 | 0.2644 | 421.63                 | 0.1813 | 421.00                 | 0.1295 | 438.48                 | 0.1791 | 438.43                 | 0.1339 | NA                     | NA     |
|                    | 329.40                 | 0.0272 | 329.07                 | 0.0262 | 393.59                 | 0.0000 | 394.58                 | 0.0000 | 427.43                 | 0.0000 | 428.31                 | 0.0000 | NA                     | NA     |
|                    | 316.70                 | 0.0421 | 316.13                 | 0.0367 | 365.67                 | 0.1759 | 366.18                 | 0.1632 | 378.47                 | 0.2621 | 379.20                 | 0.2213 | NA                     | NA     |
| n-hexane           | 386.56                 | 1.6428 | 382.78                 | 2.0011 | 435.70                 | 1.6791 | 434.17                 | 1.3705 | 452.74                 | 1.5511 | 451.95                 | 1.2153 | 391                    | 0.2255 |
|                    | 380.44                 | 0.7659 | 379.94                 | 0.3412 | 431.72                 | 0.2280 | 427.95                 | 0.4532 | 448.57                 | 0.2143 | 444.64                 | 0.4558 | 372                    | 0.1975 |
|                    | 330.36                 | 0.0520 | 329.68                 | 0.0468 | 387.75                 | 0.0001 | 396.04                 | 0.0000 | 420.54                 | 0.0000 | 430.01                 | 0.0000 | 363                    | 0.2144 |
|                    | 279.35                 | 0.1480 | 279.27                 | 0.1572 | 387.70                 | 0.0000 | 374.17                 | 0.0001 | 420.08                 | 0.0001 | 405.24                 | 0.0000 | 284                    | 0.3412 |
| toluene            | 388.54                 | 1.6324 | 384.52                 | 2.0534 | 437.40                 | 1.7386 | 435.86                 | 1.3438 | 454.40                 | 1.6121 | 453.61                 | 1.1972 | 396                    | 1.5665 |
|                    | 382.58                 | 0.8391 | 382.07                 | 0.3523 | 433.87                 | 0.2384 | 429.14                 | 0.5555 | 450.69                 | 0.2231 | 445.58                 | 0.5499 | 377                    | 1.4772 |
|                    | 330.60                 | 0.0601 | 329.77                 | 0.0530 | 389.02                 | 0.0001 | 396.31                 | 0.0000 | 421.55                 | 0.0001 | 430.31                 | 0.0000 | 345                    | 0.7905 |
|                    | 271.74                 | 0.3360 | 276.05                 | 0.0200 | 334.01                 | 0.0000 | 339.26                 | 0.0001 | 352.26                 | 0.0538 | 351.15                 | 0.0001 | 290                    | 1.6218 |
| 1,2-dichloroethane | 387.14                 | 1.6863 | 382.95                 | 2.1840 | 435.14                 | 1.7835 | 433.55                 | 1.2767 | 451.86                 | 1.6101 | 450.83                 | 1.1493 | 396                    | 1.7567 |
|                    | 381.65                 | 0.7669 | 380.67                 | 0.2003 | 431.49                 | 0.2132 | 424.10                 | 0.6596 | 447.74                 | 0.2520 | 439.49                 | 0.6459 | 377                    | 1.7827 |
|                    | 330.12                 | 0.0559 | 328.99                 | 0.0497 | 393.42                 | 0.0001 | 396.59                 | 0.0000 | 382.58                 | 0.1107 | 430.55                 | 0.0002 | 365                    | 1.6492 |
|                    | 278.99                 | 0.1583 | 278.91                 | 0.1667 | 341.43                 | 0.0530 | 341.44                 | 0.0520 | 348.80                 | 0.0213 | 366.67                 | 0.0000 | 288                    | 2.0418 |
| ethanol            | 385.46                 | 1.7130 | 381.35                 | 2.1512 | 433.19                 | 1.7582 | 431.49                 | 1.2662 | 449.76                 | 1.5833 | 448.59                 | 1.1402 | 390                    | 0.8575 |
|                    | 380.01                 | 0.6972 | 378.84                 | 0.1885 | 429.18                 | 0.2082 | 421.42                 | 0.6428 | 445.22                 | 0.2514 | 436.51                 | 0.6317 | 380                    | 0.8597 |
|                    | 316                    | 0.1111 | 313                    | 0.0549 | 367.78                 | 0.0284 | 366.63                 | 0.0903 | 380.91                 | 0.1124 | 380.40                 | 0.1067 | 289                    | 0.6977 |
|                    | 267.57                 | 0.3594 | 268.13                 | 0.0234 | 324.69                 | 0.0000 | 324.72                 | 0.0080 | 348.50                 | 0.0218 | 345.99                 | 0.0000 | 232                    | 1.2406 |

NA= no measurement available; A rel. = represents the relative absorbance of the most intense peak as results from experimental spectra.

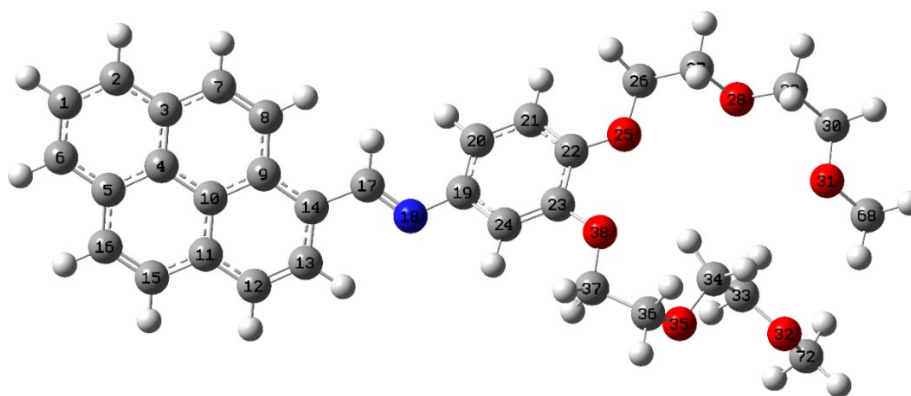

**Fig. S7** The molecular system optimized with PBE0/6-311+G(d,p)

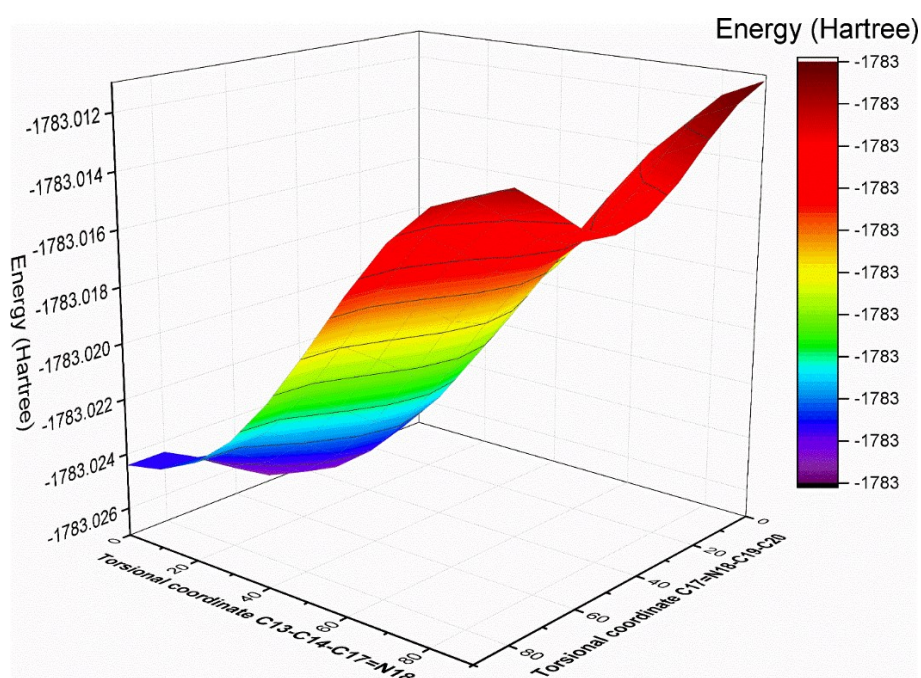

**Fig. S8** Potential energy surface scan for the dihedral angles C13–C14–C17=N18 and C17=N18–C19–C20 (labels in agreement with Figure S7) in proposed structure with PBE0/6-311+G(d,p)

**Table S3.** The energy differences (Hartree) between the **i1** and **i2** position isomers, as well as the dipole moments.

| Isomer    | Energy       | Energy differences (kcal/mol) | $\mu$ (D) |
|-----------|--------------|-------------------------------|-----------|
| <b>i1</b> | -2641.477658 | 0.42                          | 4.59      |
| <b>i2</b> | -2641.478331 | 0                             | 4.52      |

**Table S4.** Dihedral angle values [°] of **i1** and **i2** isomers computed with PBE0/6-311+G(d,p) method.

| Position | Dihedral angle  | i1     | Dihedral angle  | i2     |
|----------|-----------------|--------|-----------------|--------|
| $\alpha$ | C9-C14-C17=N18  | 175.8  | C9-C14-C17=N18  | 175.2  |
|          | C14-C17=N18-C19 | 176.2  | C14-C17=N18-C19 | 176.2  |
|          | C17=N18-C19-C24 | 145.4  | C17=N18-C19-C24 | 145.1  |
| $\beta$  | C36-C35-N38=C39 | 33.3   | C35-C34-N38=C39 | 39.4   |
|          | C35-N38=C39-C40 | -177.5 | C34-N38=C39-C40 | -177.1 |
|          | N38=C39-C40-C41 | 3.6    | N38=C39-C40-C41 | 4.8    |

**Table S5.** Bond length values [Å] of **i1** and **i2** isomers computed with PBE0/6-311+G(d,p) method.

| Position | Bond length | i1    | Bond length | i2    |
|----------|-------------|-------|-------------|-------|
| $\alpha$ | C14-C17     | 1.461 | C14-C17     | 1.461 |
|          | C17=N18     | 1.278 | C17=N18     | 1.278 |
|          | N18-C19     | 1.397 | N18-C19     | 1.397 |
| $\beta$  | C35-N38     | 1.398 | C34-N38     | 1.400 |
|          | N38=C39     | 1.277 | N38=C39     | 1.277 |
|          | C39-C40     | 1.460 | N39-C40     | 1.461 |

**Table S6.** Valence angles values [°] of **i1** and **i2** isomers computed with PBE0/6-311+G(d,p) method.

| Position | Valence angle | i1    | Valence angle | i2    |
|----------|---------------|-------|---------------|-------|
| $\alpha$ | C14-C17=N18   | 122.0 | C14-C17=N18   | 122.0 |
|          | C17=N18-C19   | 119.6 | C17=N18-C19   | 119.5 |
| $\beta$  | C35-N38=C39   | 119.7 | C34-N38=C39   | 119.1 |
|          | N38=C39-C40   | 126.6 | N38=C39-C40   | 126.7 |

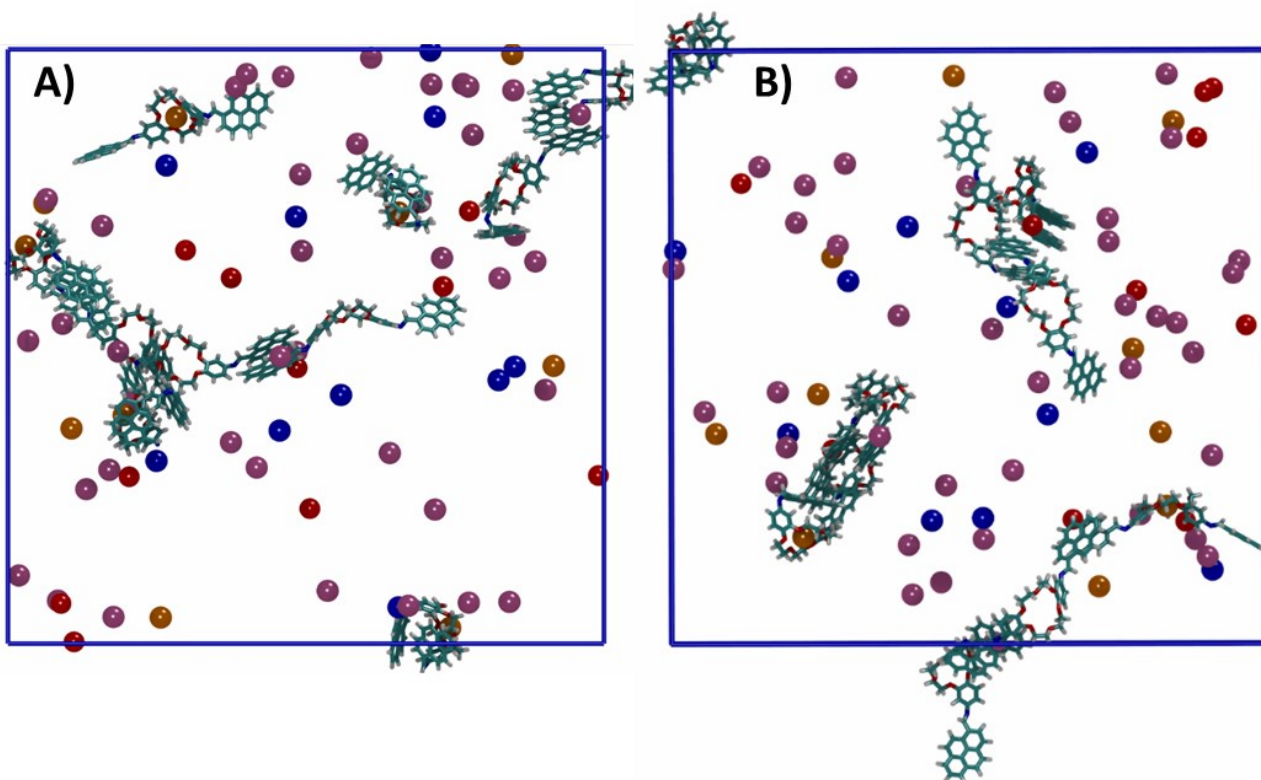

**Fig. S9** Final structures obtained after the A) first simulation and B) second simulation of the DPyDB-C=N-18C6 molecules in the ion mixture. Each atom is colored as follows: C atoms are teal, O atoms are red, N atoms are blue, H atoms are white,  $K^+$  atoms are orange spheres,  $Na^+$  atoms are red spheres,  $Ca^{2+}$  atoms are blue spheres and  $Cl^-$  atoms are purple spheres.
